# Supplementary material for: Impact of the COVID-19 pandemic on mortality trends in Japan: a reversal in 2021? A descriptive analysis of national mortality data, 1995–2021
Source: PubMed Central journal article supplement — BMJ Open. 2023 Aug 31;13(8):e071785. doi: 10.1136/bmjopen-2023-071785 (PMC10476106; doi:10.1136/bmjopen-2023-071785), 2023-08-31
Supplement: bmjopen-2023-071785supp001.pdf [file bmjopen-2023-071785supp001.pdf]

Appendix Table 1. Number of deaths in Japan between 1995 and 2021\*

| Year | Men       |                     |               |                         |          | Women     |                     |               |                         |          |
|------|-----------|---------------------|---------------|-------------------------|----------|-----------|---------------------|---------------|-------------------------|----------|
|      | All-cause | Malignant neoplasms | Heart disease | Cerebrovascular disease | COVID-19 | All-cause | Malignant neoplasms | Heart disease | Cerebrovascular disease | COVID-19 |
| 1995 | 501276    | 159623              | 69718         | 69587                   | -        | 420863    | 103399              | 69488         | 76965                   | -        |
| 1996 | 488605    | 164824              | 68977         | 66479                   | -        | 407606    | 106359              | 69252         | 73887                   | -        |
| 1997 | 497796    | 167076              | 69776         | 65790                   | -        | 415606    | 108337              | 70398         | 72907                   | -        |
| 1998 | 512128    | 172306              | 71134         | 65529                   | -        | 424356    | 111615              | 71986         | 72290                   | -        |
| 1999 | 534778    | 175817              | 73979         | 66452                   | -        | 447253    | 114739              | 77100         | 72537                   | -        |
| 2000 | 525903    | 179140              | 72156         | 63127                   | -        | 435750    | 116344              | 74585         | 69402                   | -        |
| 2001 | 528768    | 181393              | 72727         | 63146                   | -        | 441563    | 119265              | 75565         | 68710                   | -        |
| 2002 | 535305    | 184033              | 74986         | 62229                   | -        | 447074    | 120535              | 77532         | 68028                   | -        |
| 2003 | 551746    | 186912              | 77989         | 63274                   | -        | 463205    | 122631              | 81556         | 68793                   | -        |
| 2004 | 557097    | 193096              | 77465         | 61547                   | -        | 471505    | 127262              | 82160         | 67508                   | -        |
| 2005 | 584970    | 196603              | 83979         | 63657                   | -        | 498826    | 129338              | 89146         | 69190                   | -        |
| 2006 | 581370    | 198052              | 82811         | 61348                   | -        | 503080    | 131262              | 90213         | 66920                   | -        |
| 2007 | 592784    | 202743              | 83090         | 60992                   | -        | 515550    | 133725              | 92449         | 66049                   | -        |
| 2008 | 608711    | 206354              | 86139         | 61121                   | -        | 533696    | 136609              | 95789         | 65902                   | -        |
| 2009 | 609042    | 206352              | 85543         | 59293                   | -        | 532823    | 137753              | 95202         | 63057                   | -        |
| 2010 | 633700    | 211435              | 88803         | 60186                   | -        | 563312    | 142064              | 100557        | 63275                   | -        |
| 2011 | 656540    | 213190              | 91298         | 59616                   | -        | 596526    | 144115              | 103628        | 64251                   | -        |
| 2012 | 655526    | 215110              | 92976         | 58625                   | -        | 600833    | 145853              | 105860        | 62977                   | -        |
| 2013 | 658684    | 216975              | 91445         | 56718                   | -        | 609752    | 147897              | 105278        | 61629                   | -        |
| 2014 | 660334    | 218397              | 92278         | 54995                   | -        | 612670    | 149706              | 104647        | 59212                   | -        |
| 2015 | 666707    | 219508              | 92142         | 53576                   | -        | 623737    | 150838              | 103971        | 58397                   | -        |
| 2016 | 674946    | 219846              | 93453         | 52718                   | -        | 633212    | 153242              | 104617        | 56635                   | -        |
| 2017 | 690770    | 220416              | 96330         | 53198                   | -        | 649797    | 152949              | 108538        | 56698                   | -        |
| 2018 | 699138    | 218625              | 98035         | 52398                   | -        | 663332    | 154959              | 110186        | 55788                   | -        |
| 2019 | 707421    | 220339              | 98210         | 51768                   | -        | 673672    | 156086              | 109504        | 54784                   | -        |
| 2020 | 706834    | 220989              | 99304         | 50390                   | 2094     | 665921    | 157396              | 106292        | 52588                   | 1372     |
| 2021 | 738141    | 222467              | 103700        | 51594                   | 9732     | 701715    | 159038              | 111010        | 53001                   | 7034     |

\*Malignant neoplasms (ICD-10: C00-C97); Heart diseases (I01-I02.0, I05-I09, I20-I25, I27, I30-I52); Cerebrovascular diseases (I60-I69); COVID-19 (U07)

(A) All cause (men, 0-44 years)

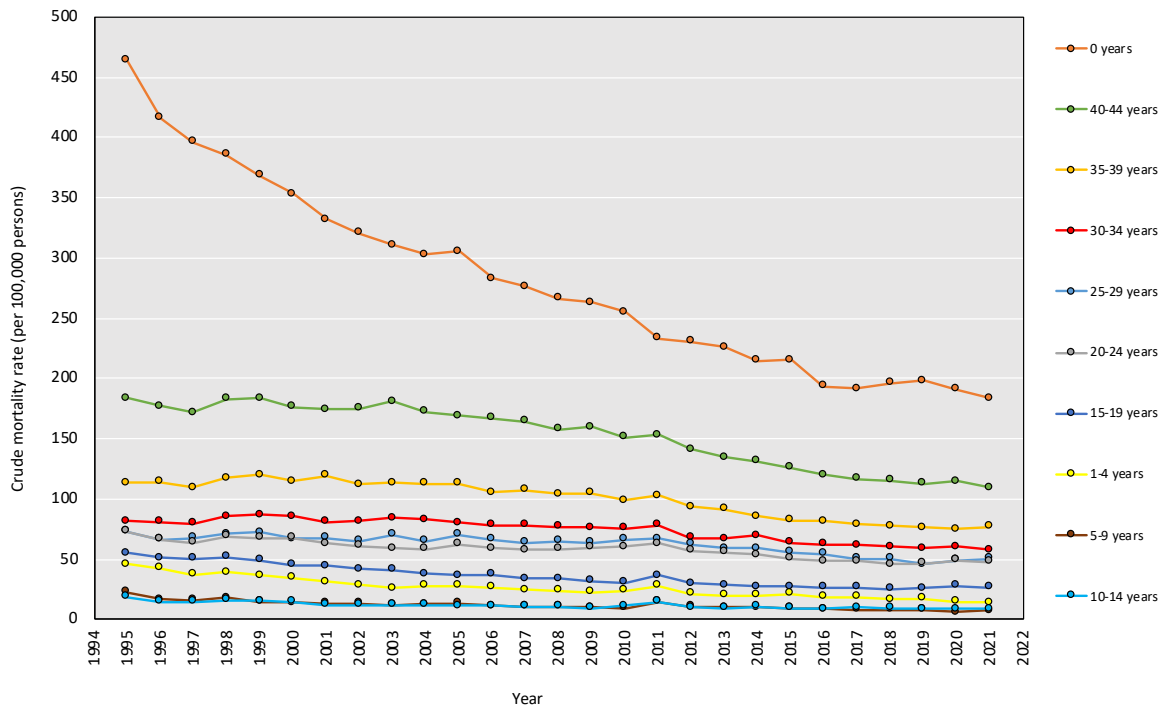

(B) All cause (women, 0-44 years)

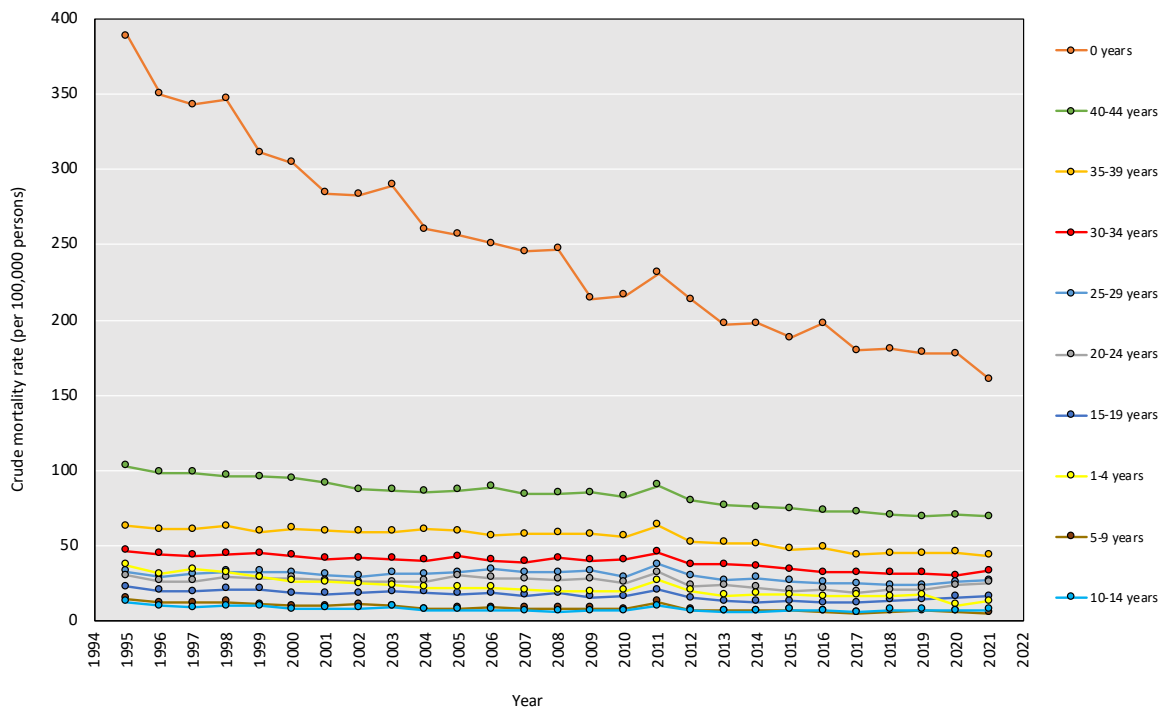

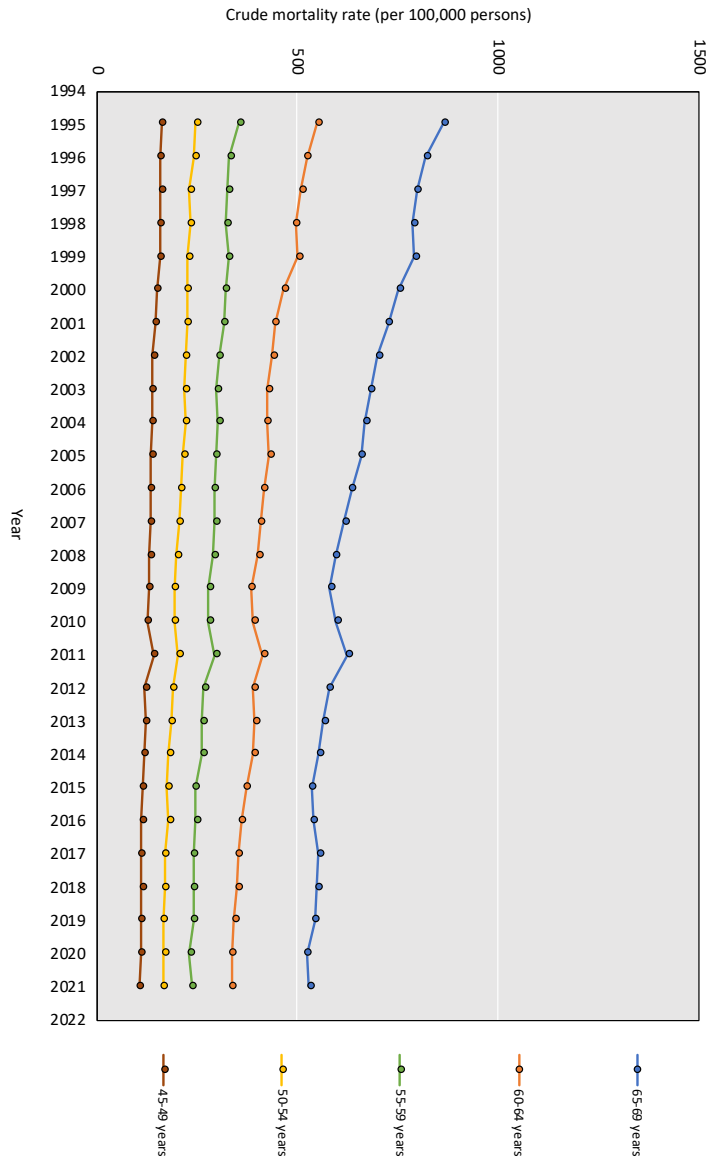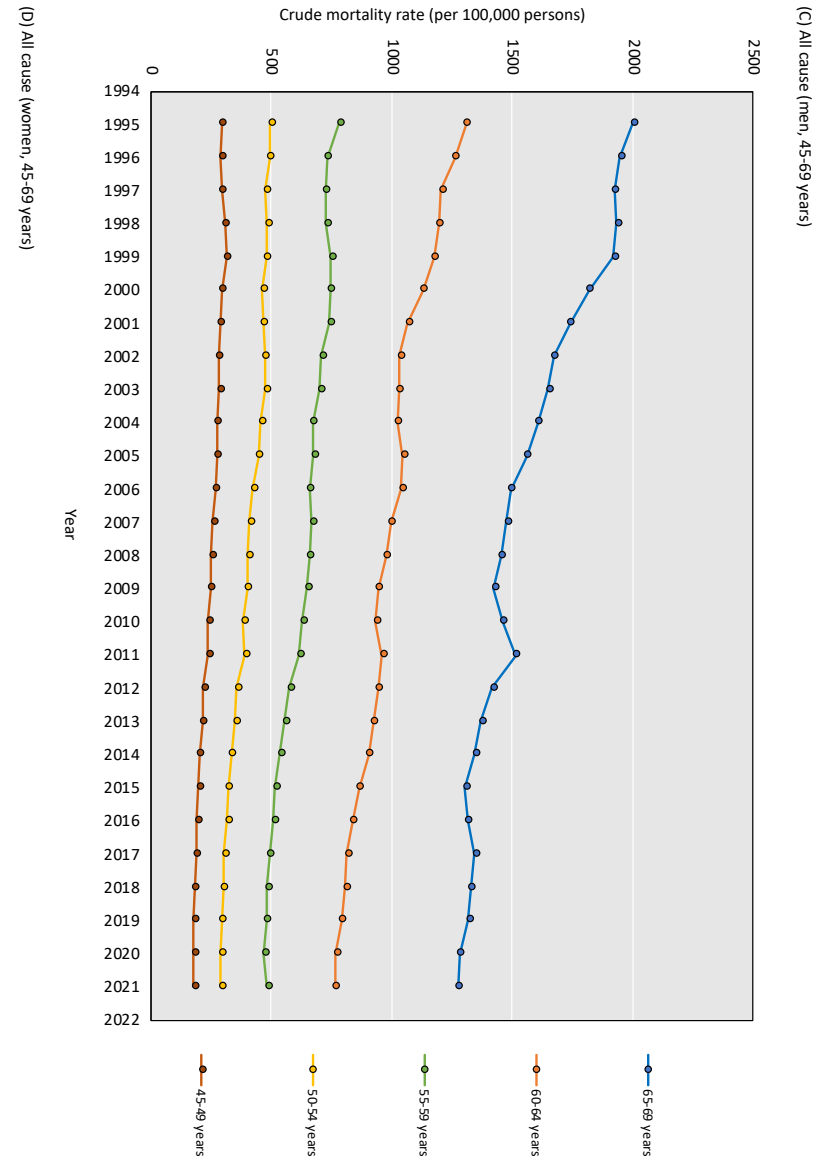

(E) All cause (men, 70-95 years and over)

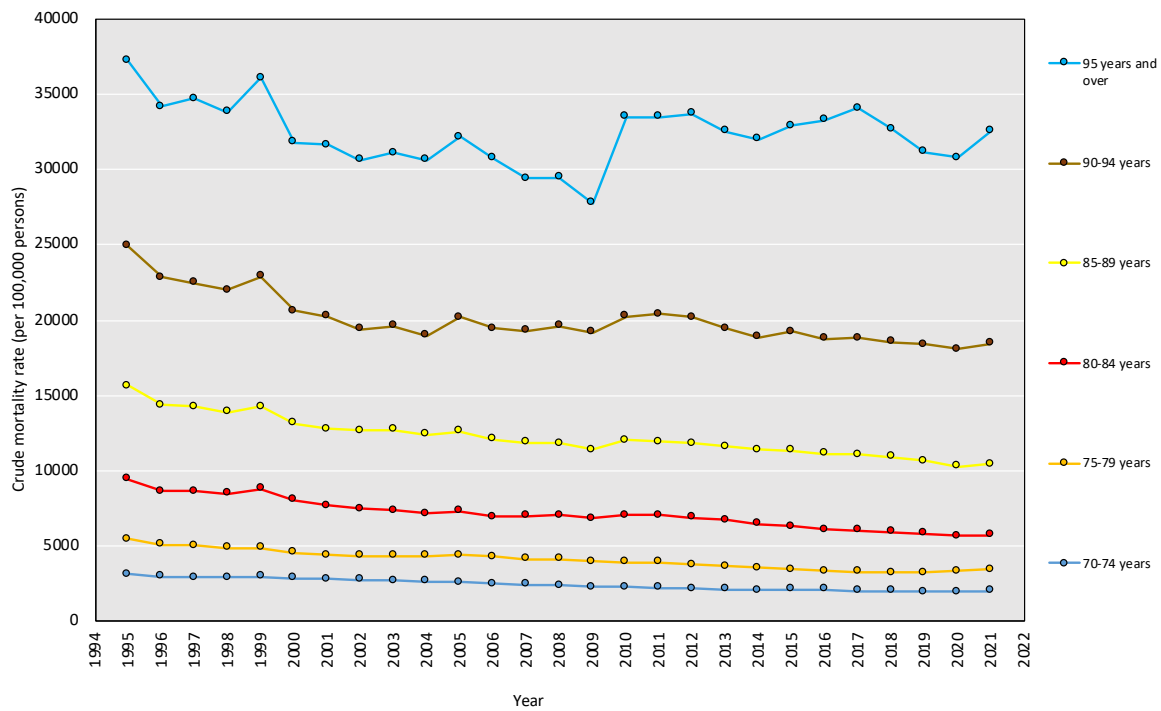

(F) All cause (women, 70-95 years and over)

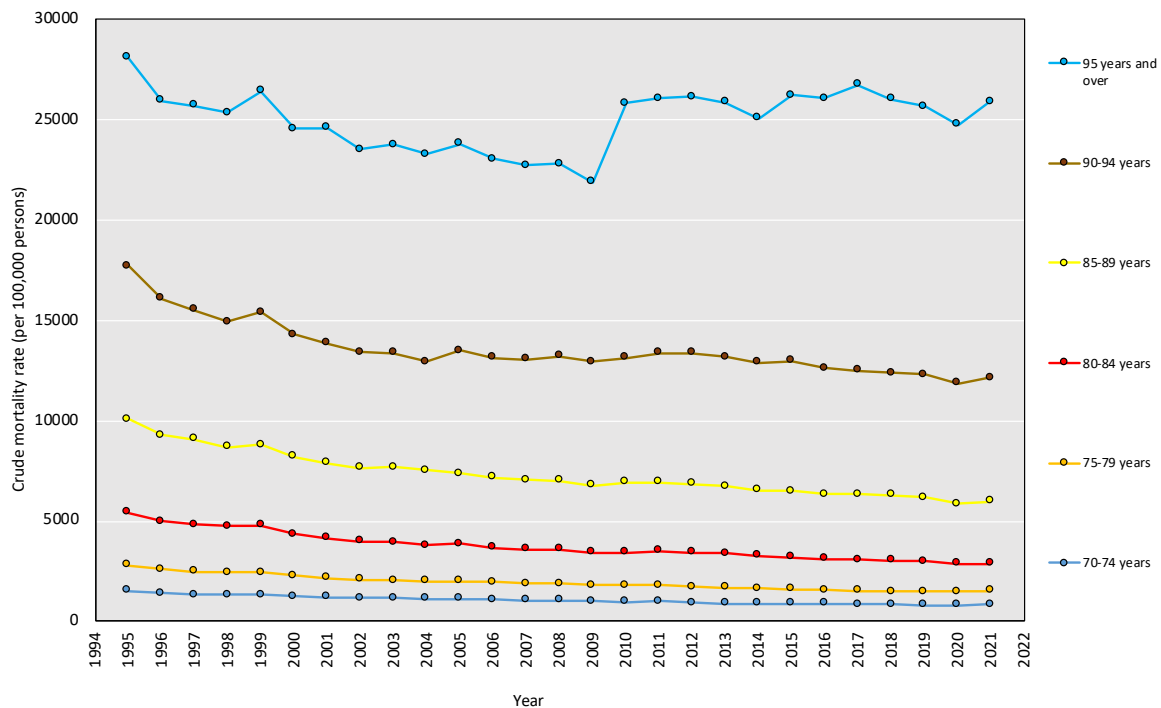

Appendix Figure 1. Trends in crude mortality rate by five-year age groups between 1995 and 2021

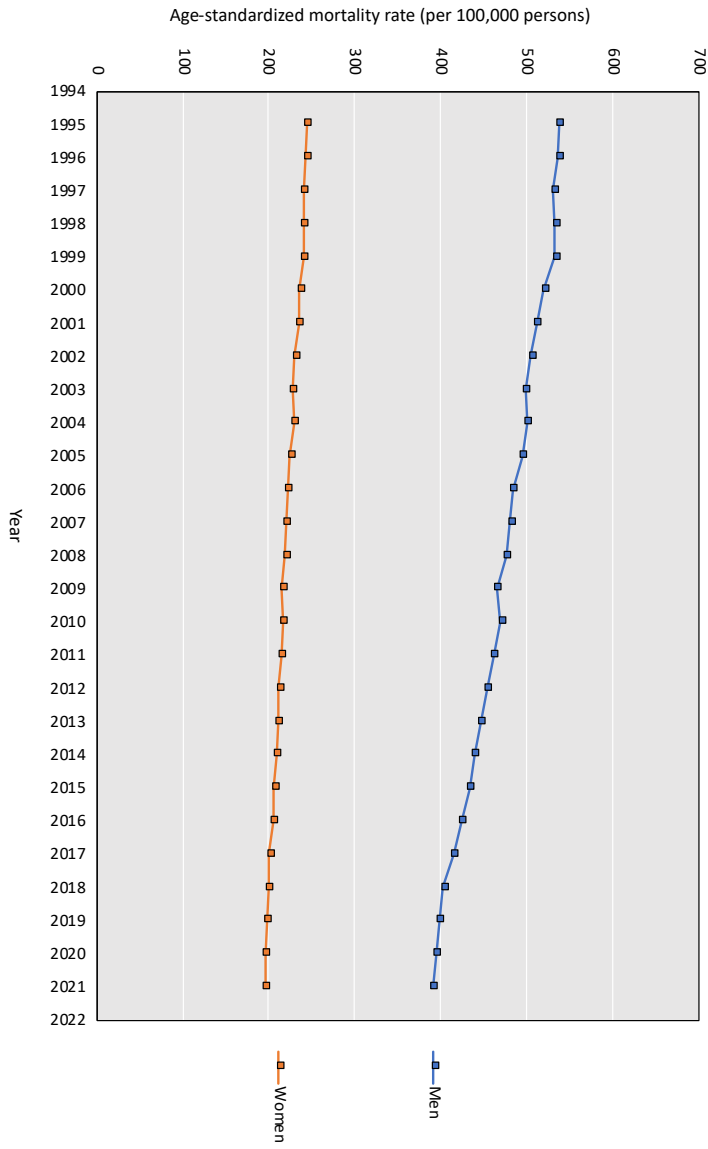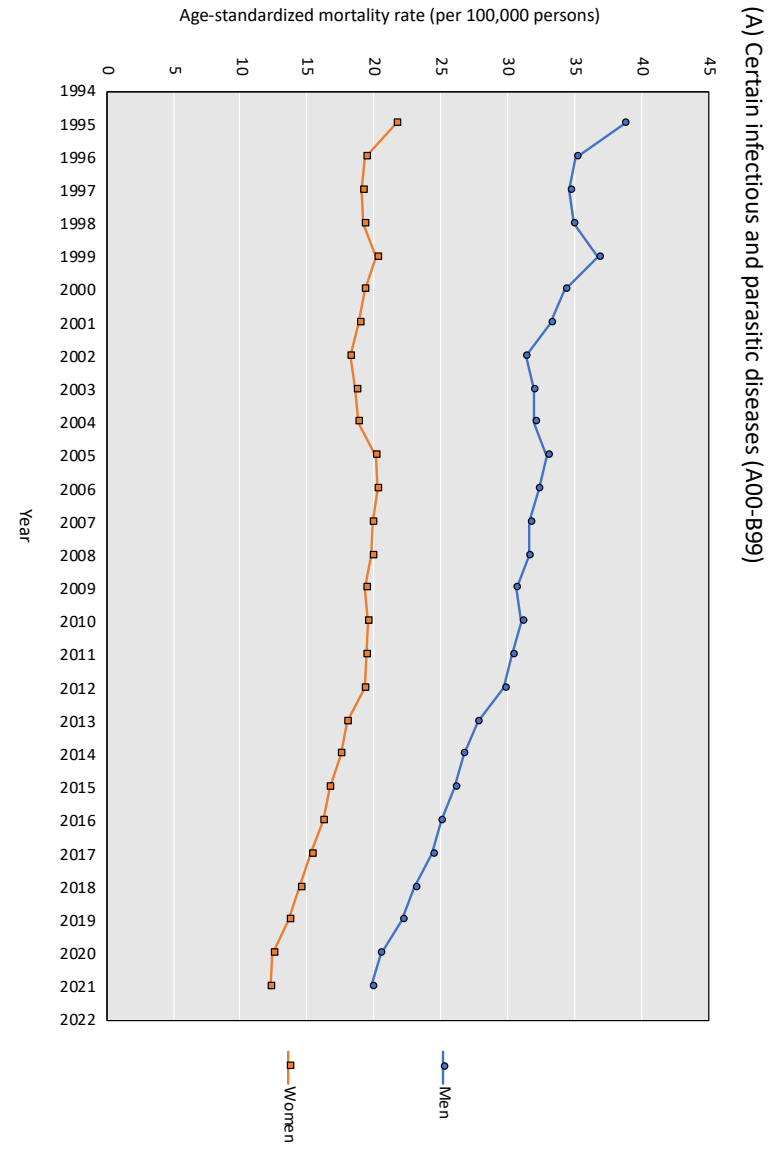

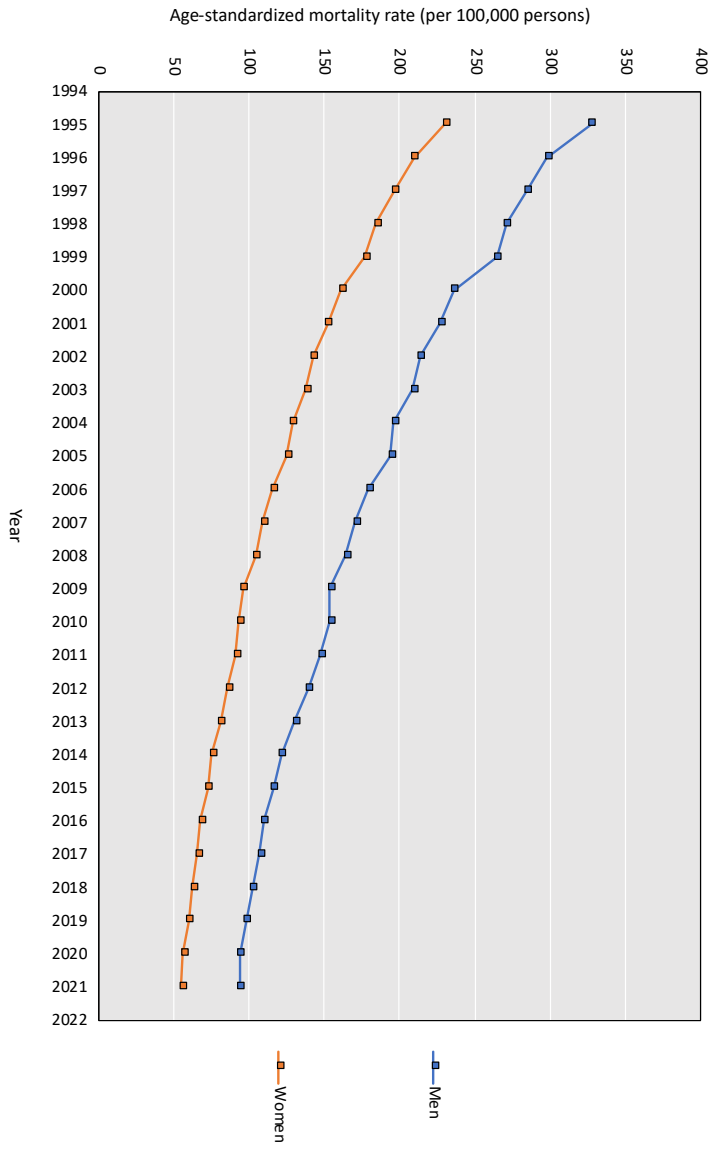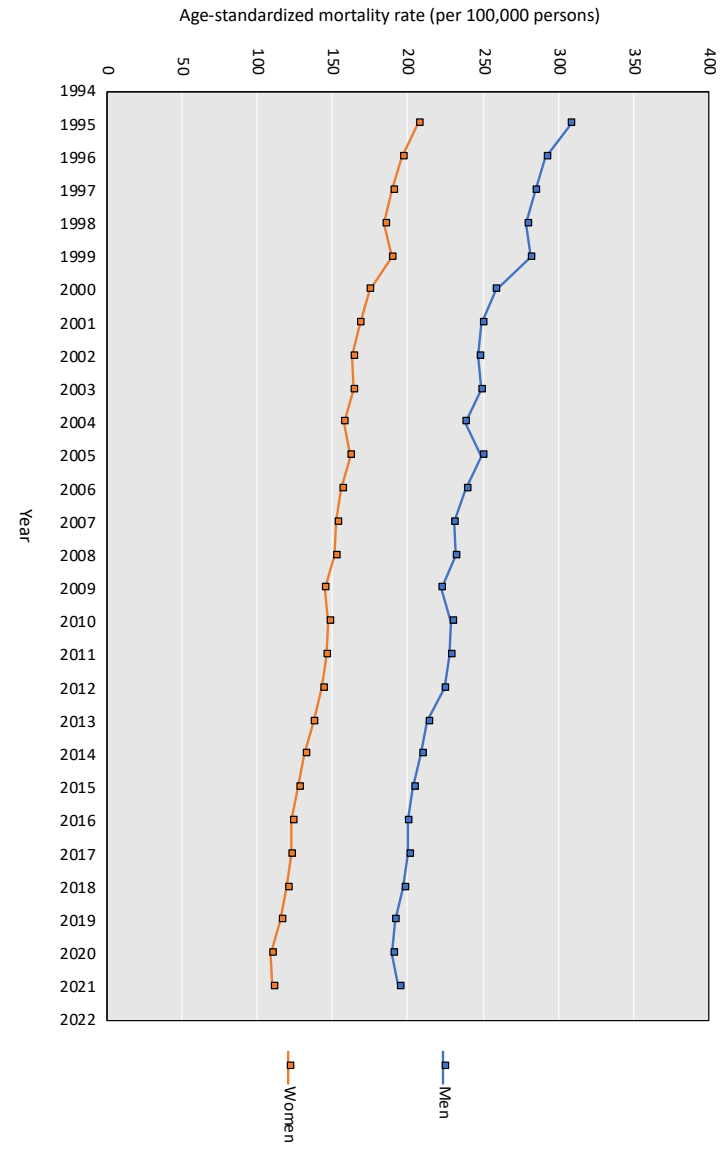

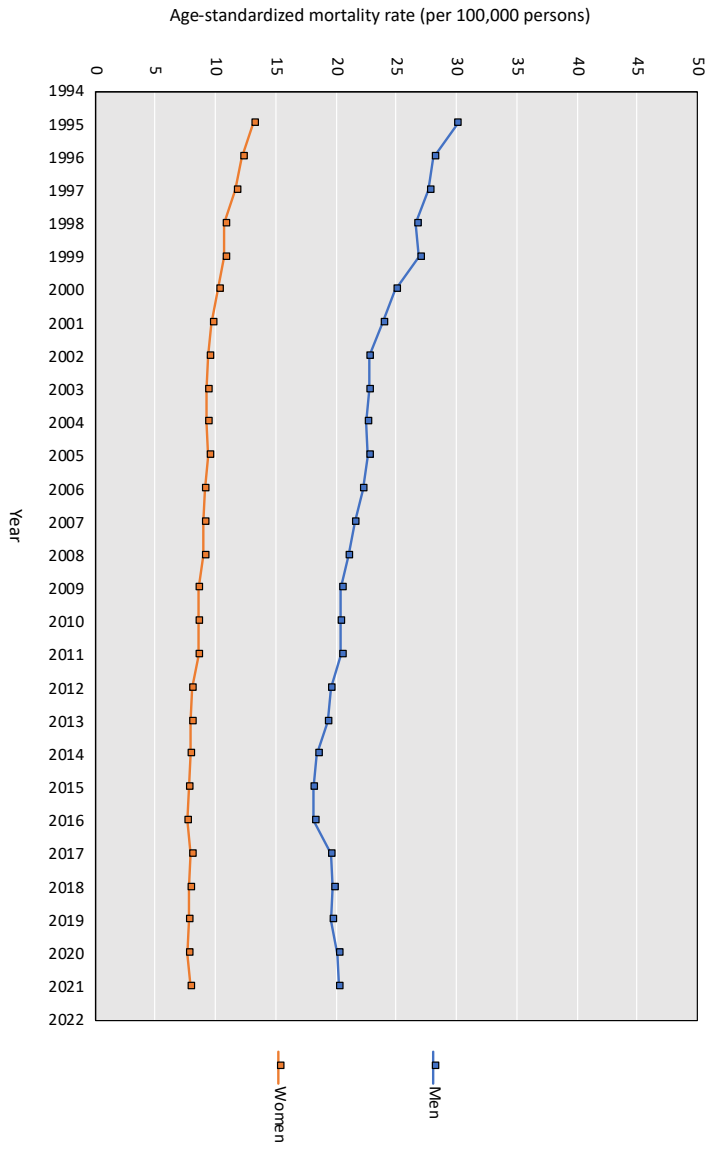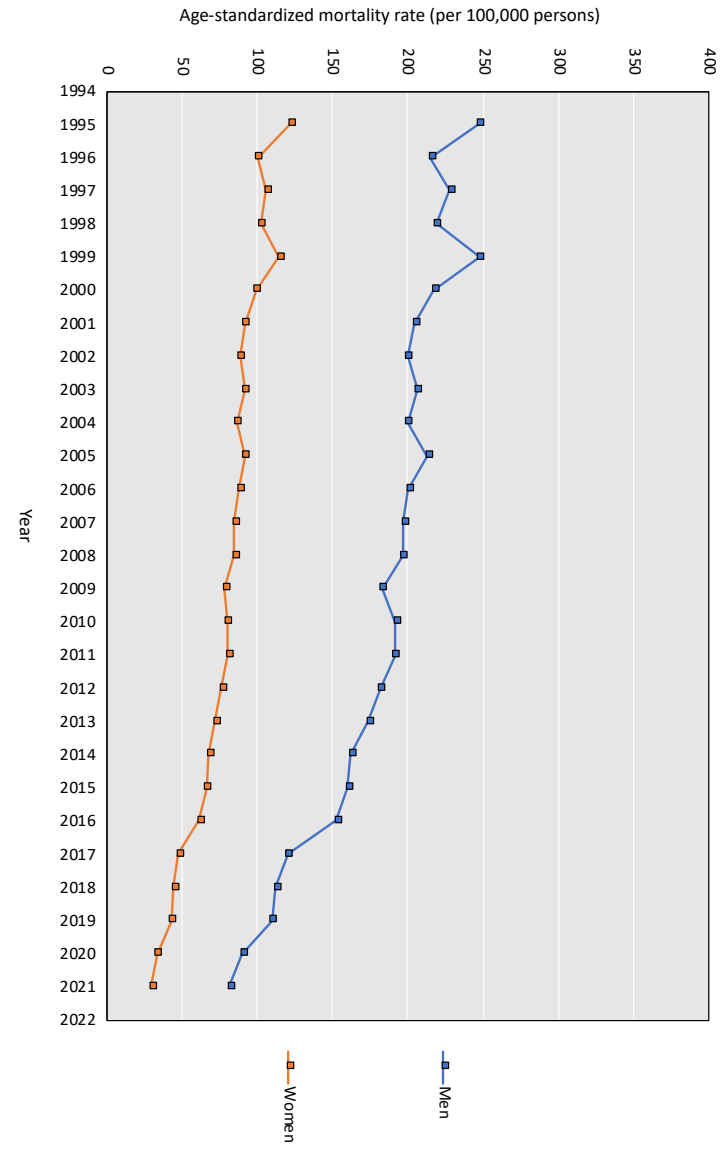

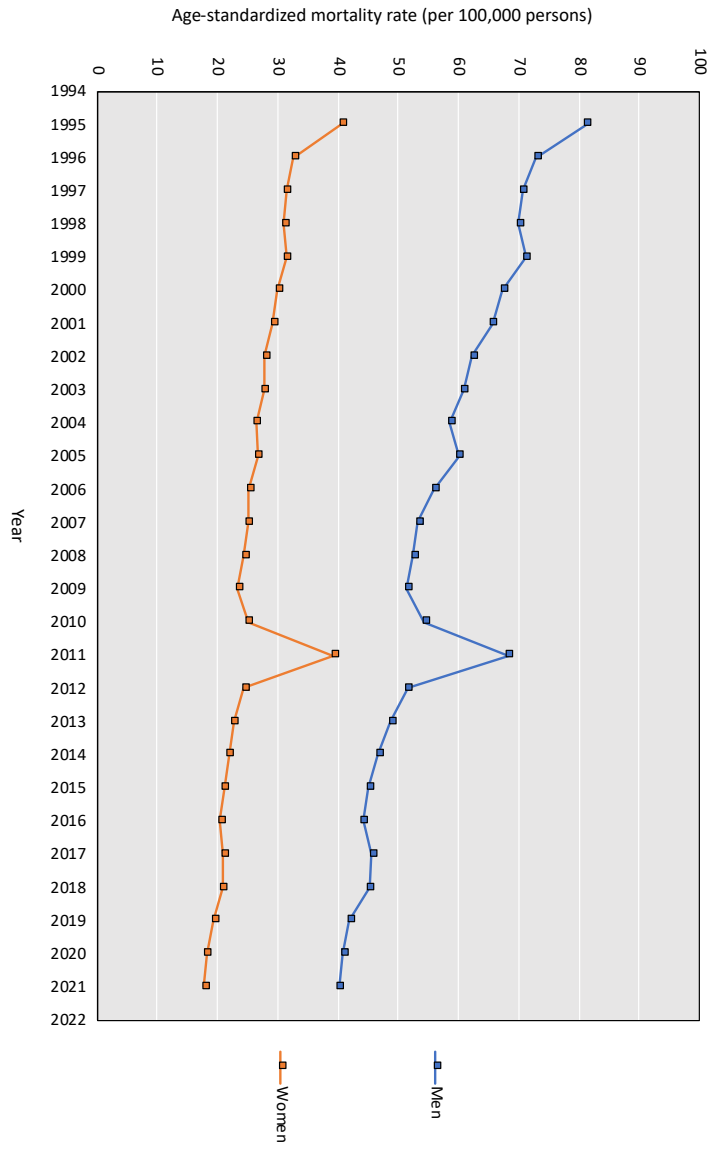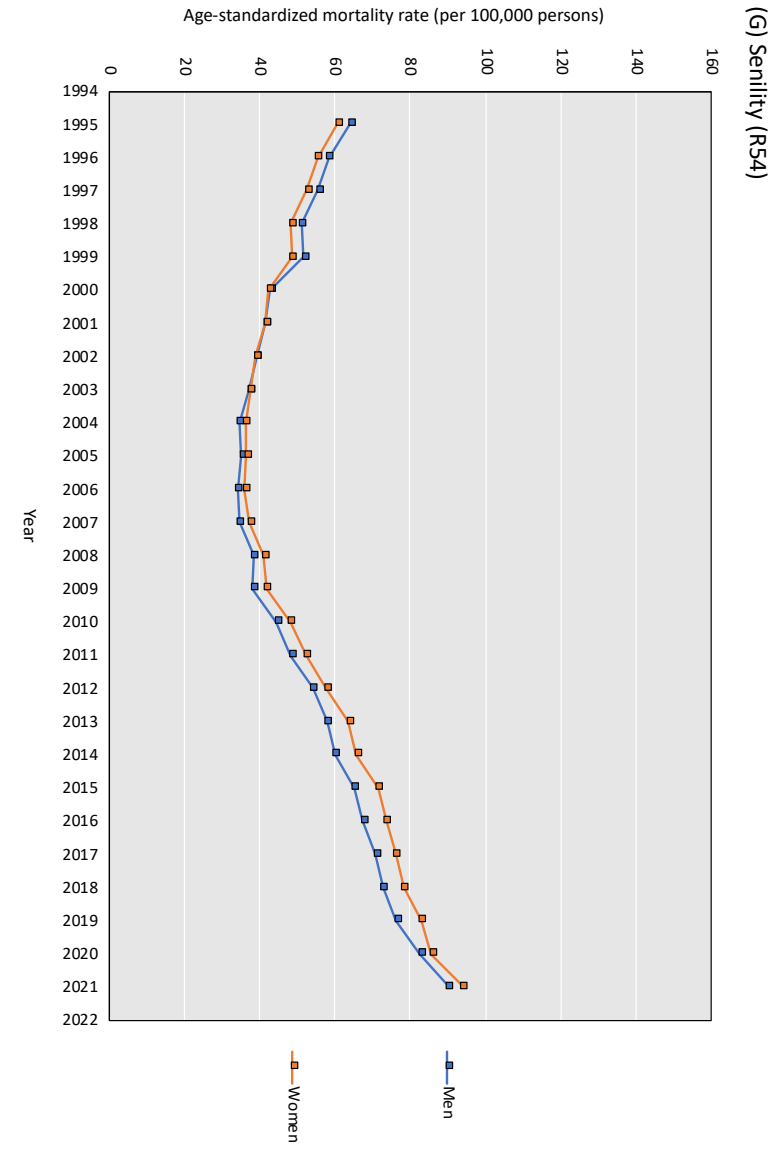



Appendix Figure 2. Trends in cause-specific age-standardized mortality rates by cancer site between 1995 and 2021

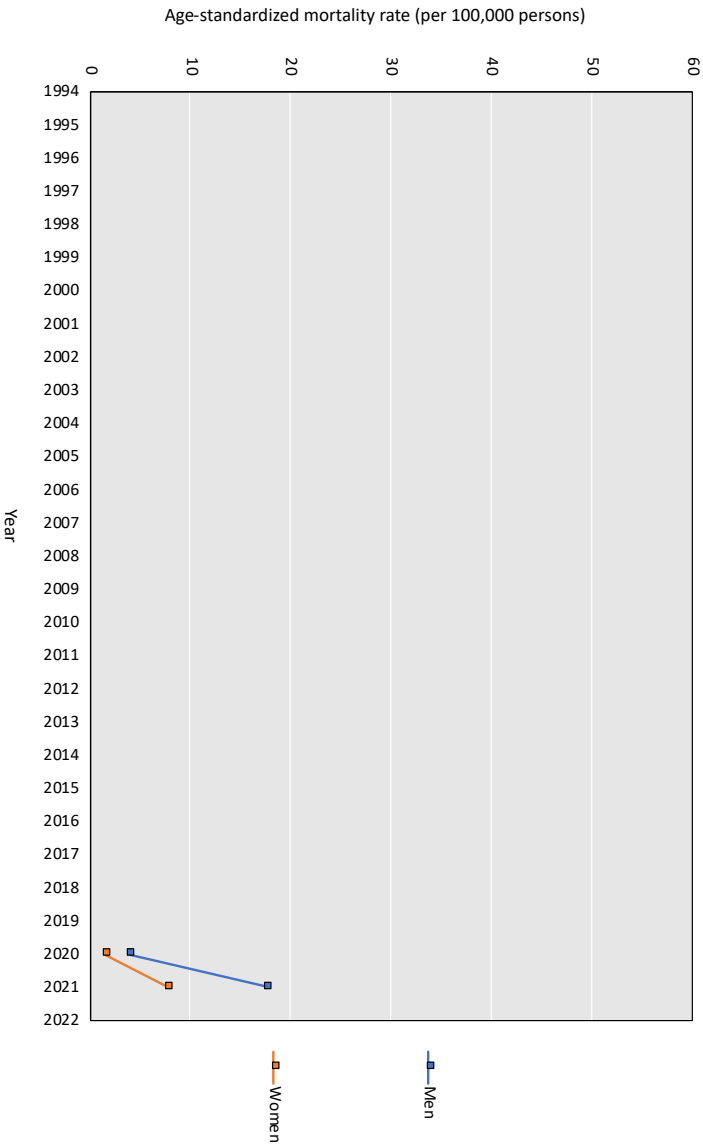

(I) COVID-19 (U07)

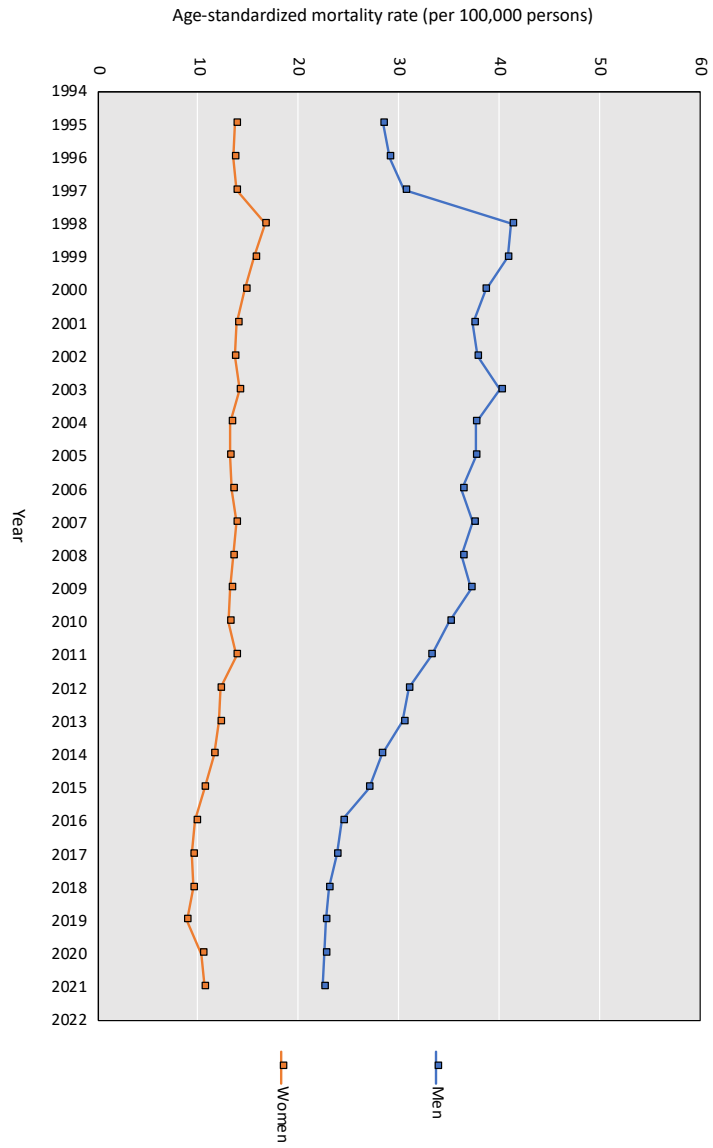

(I) Suicide (X60-84)

(A) Oral cavity and pharynx (C00-14)

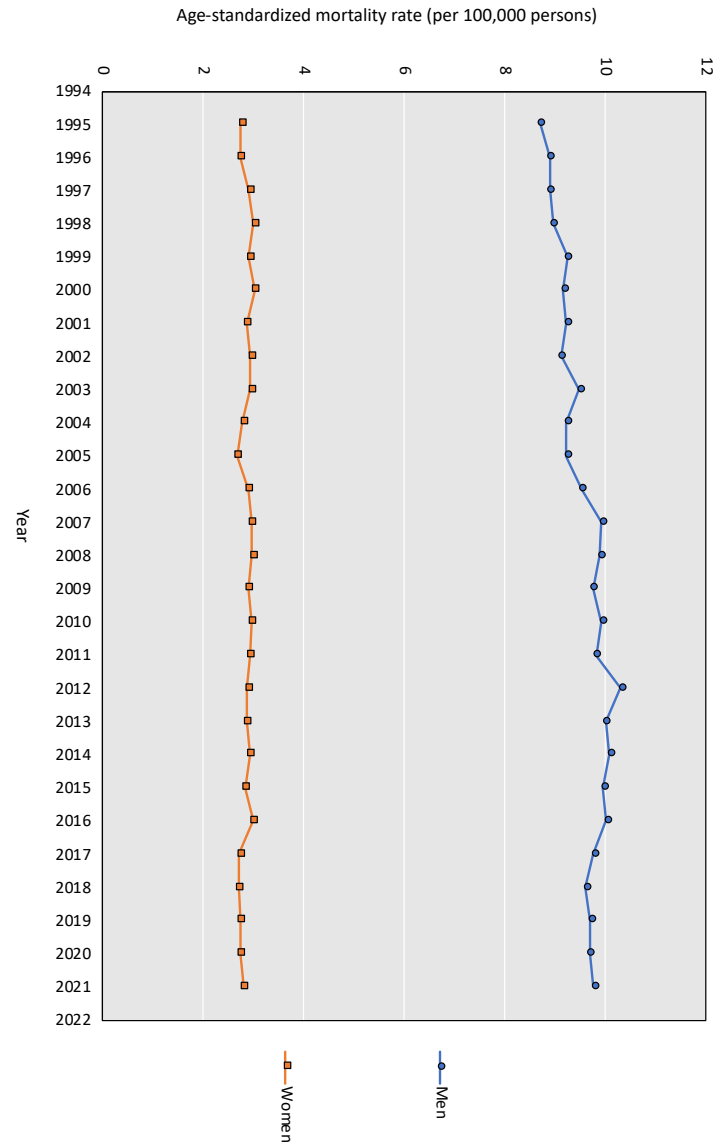

(B) Esophagus (C15)

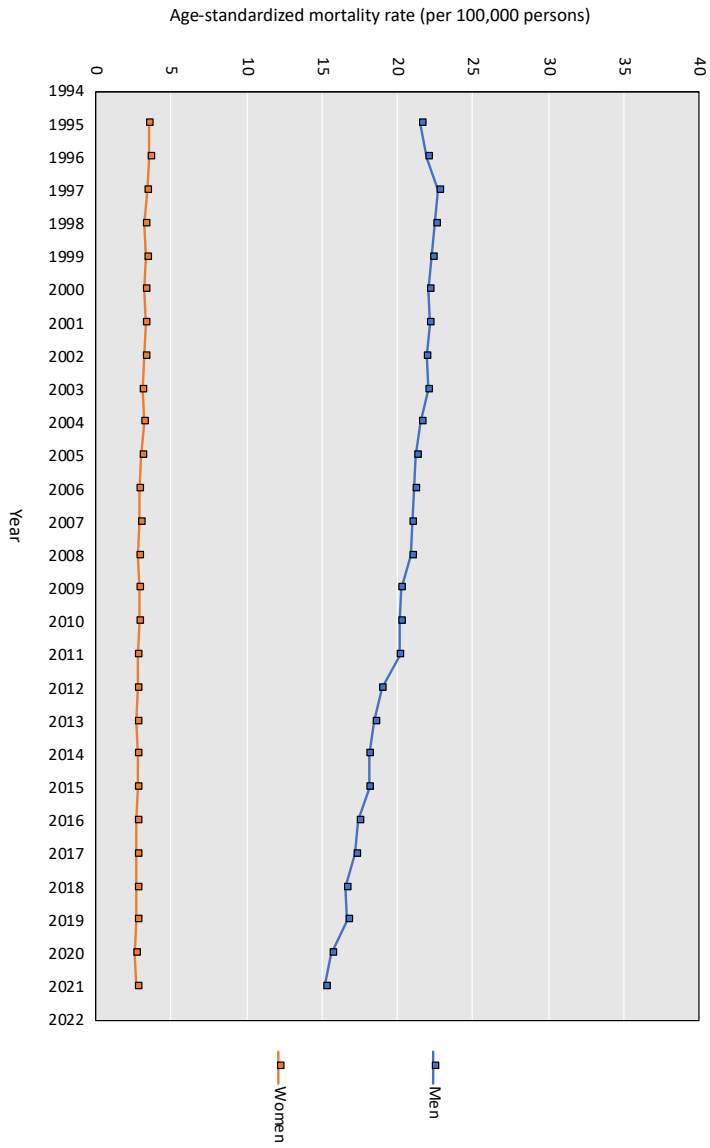

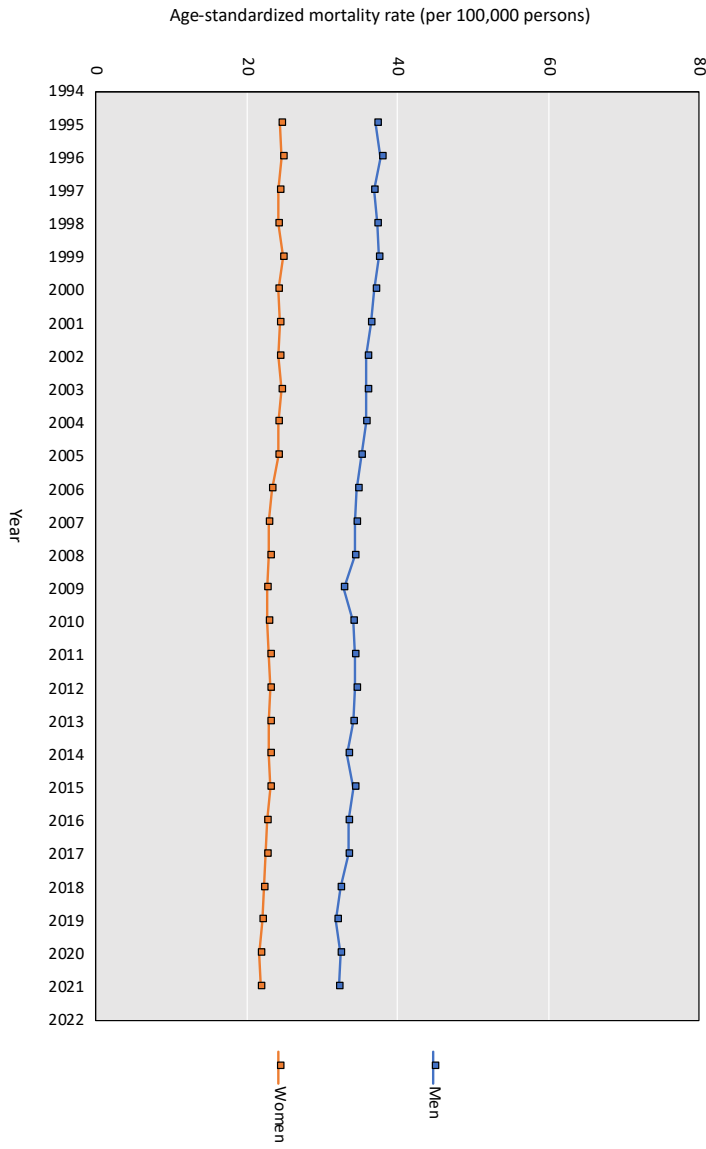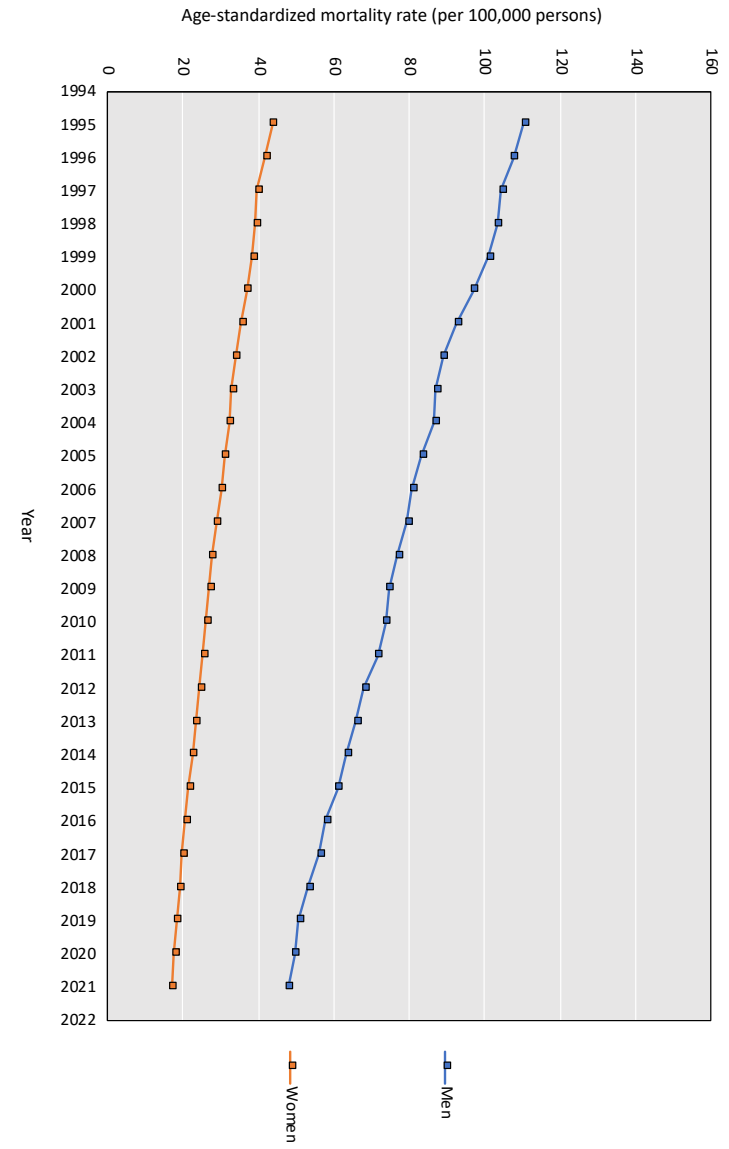

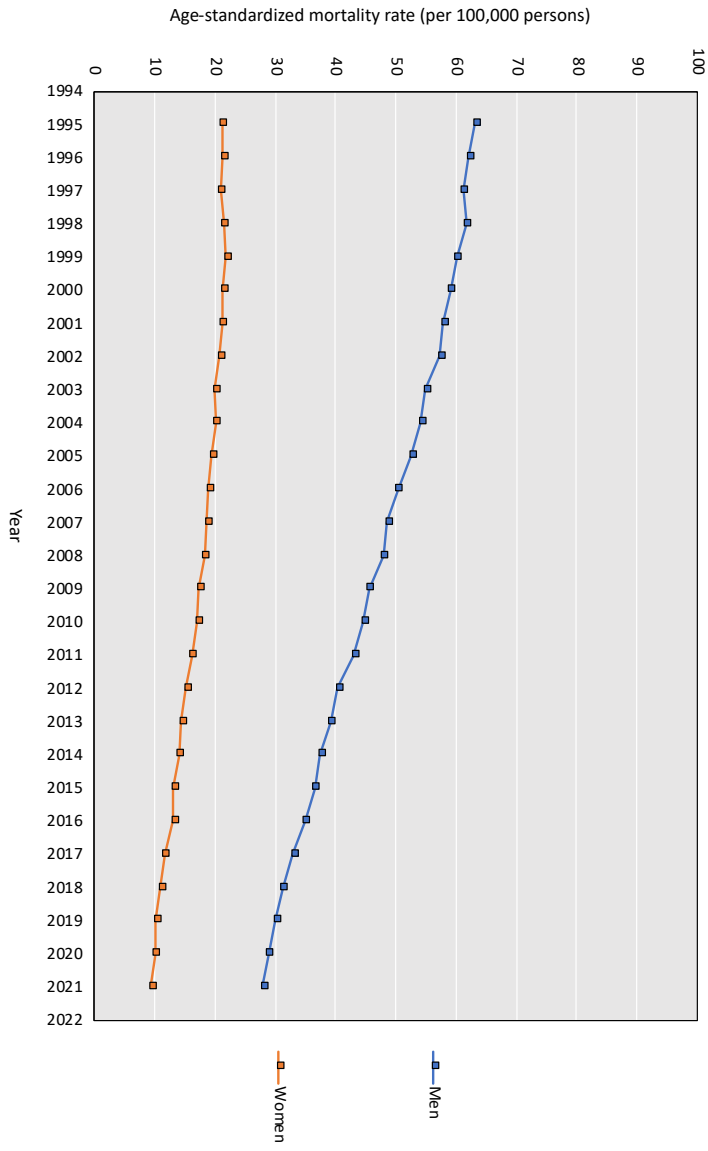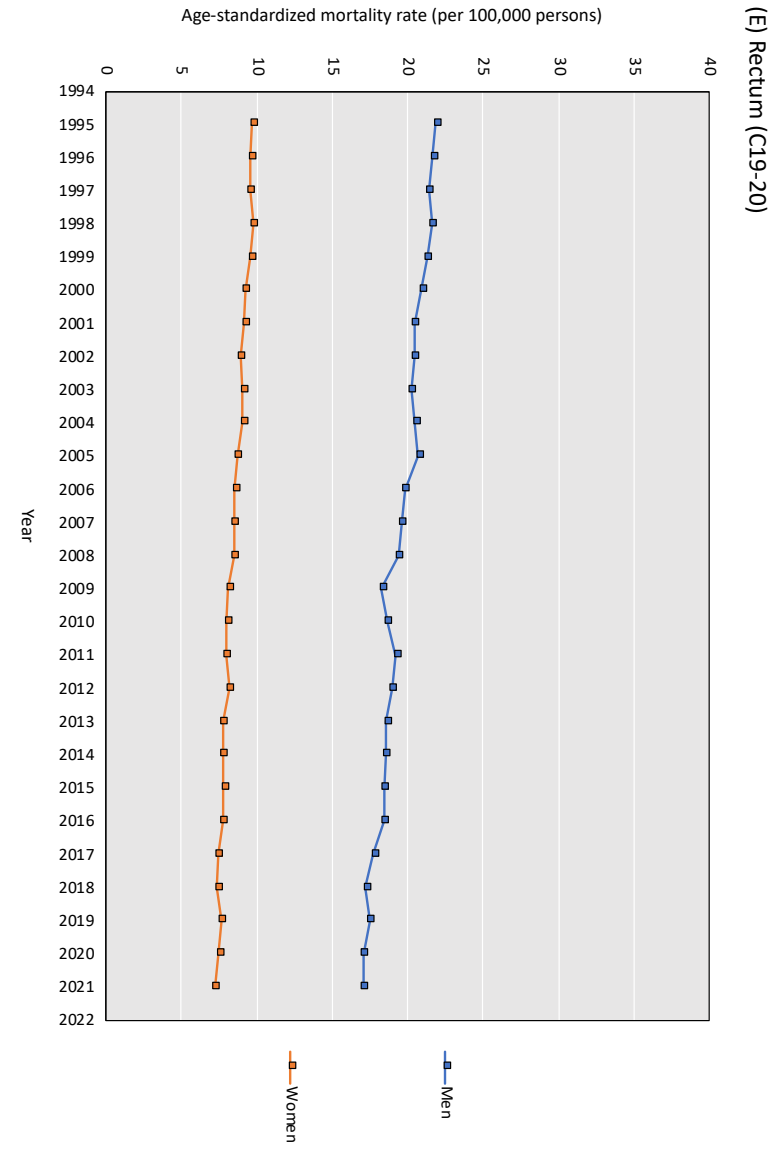

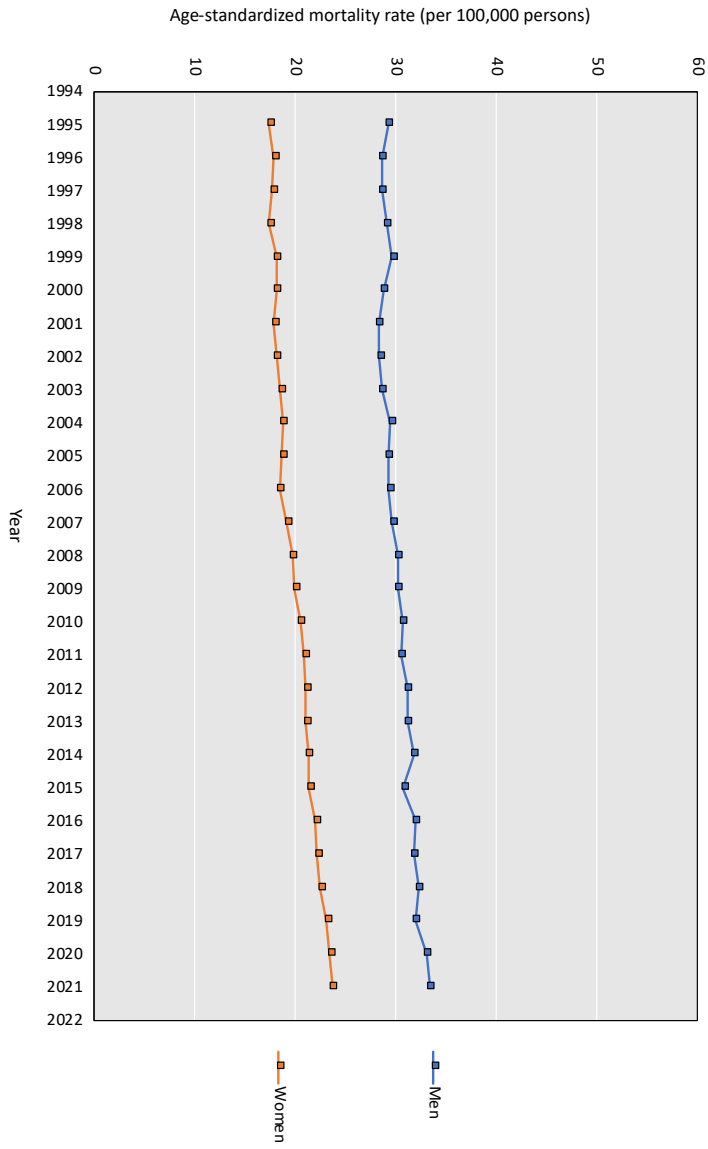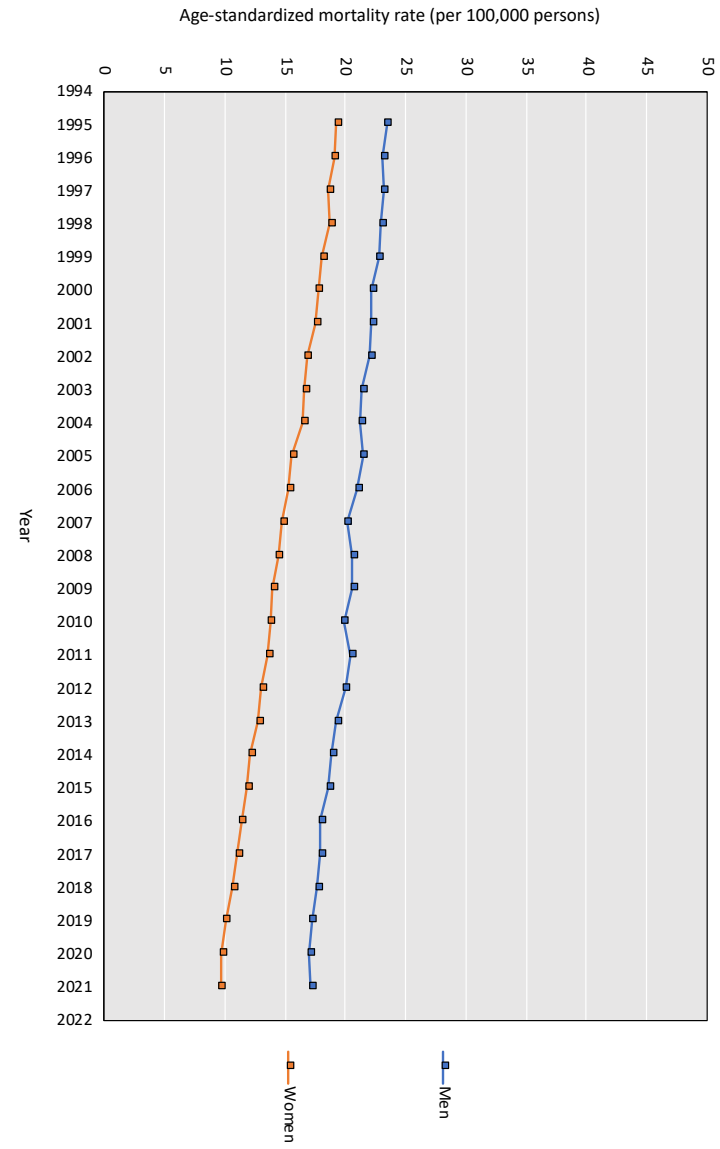

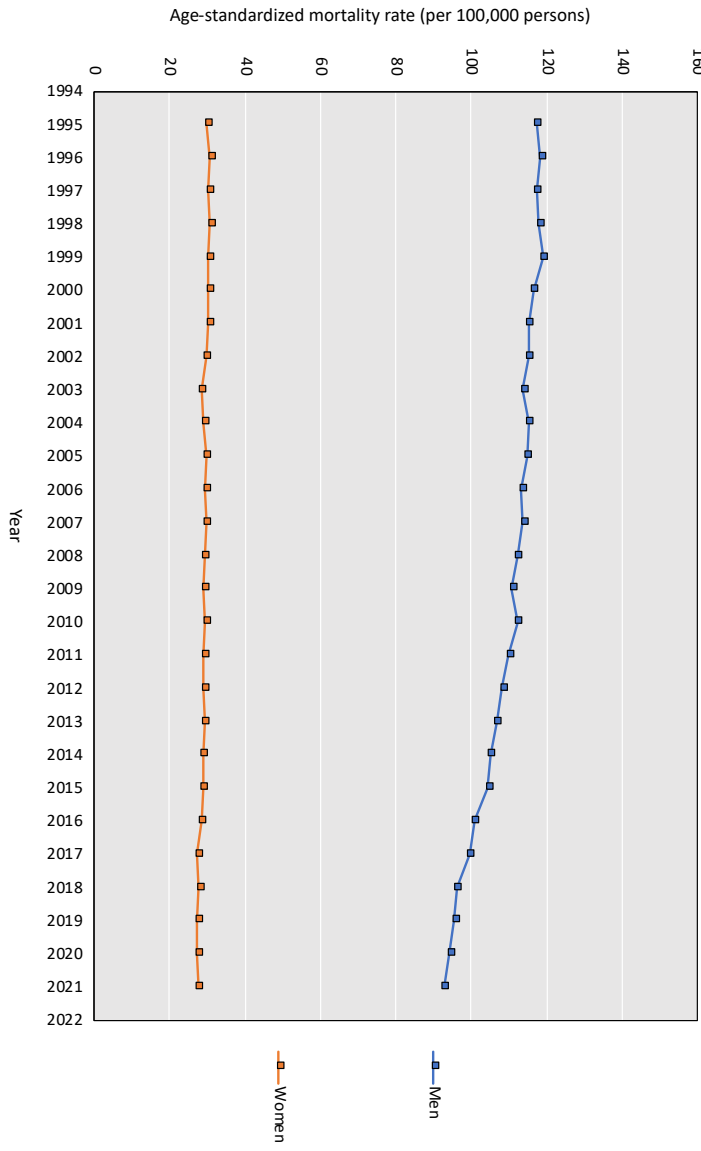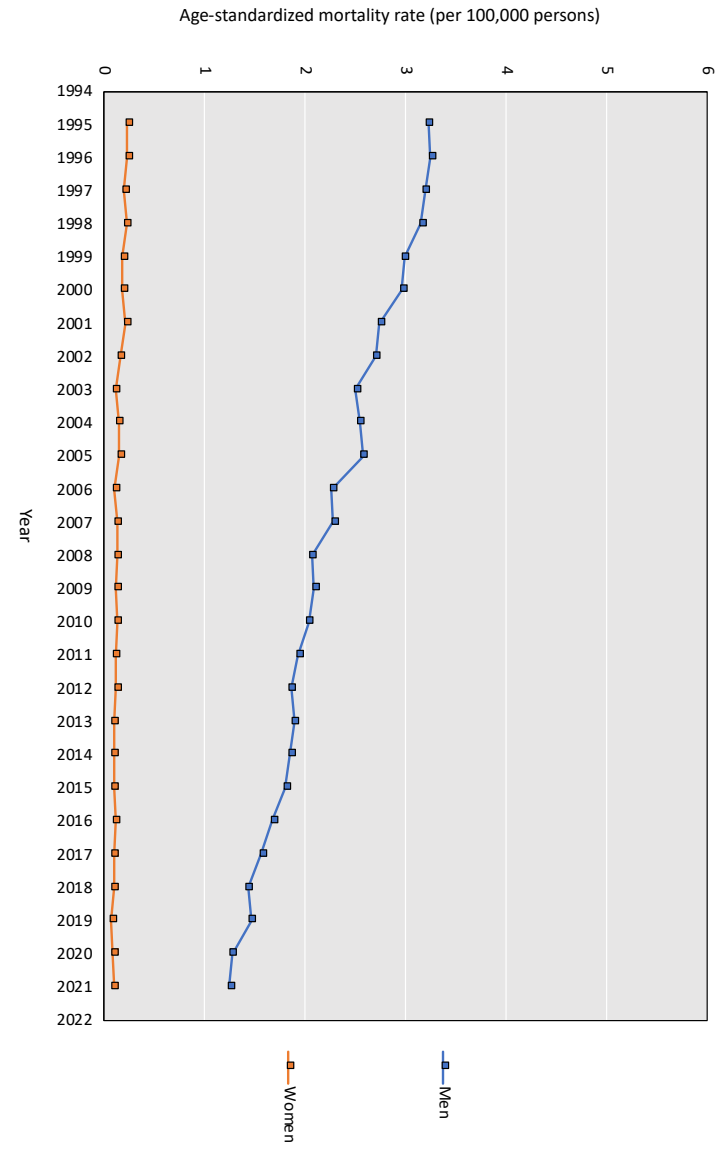

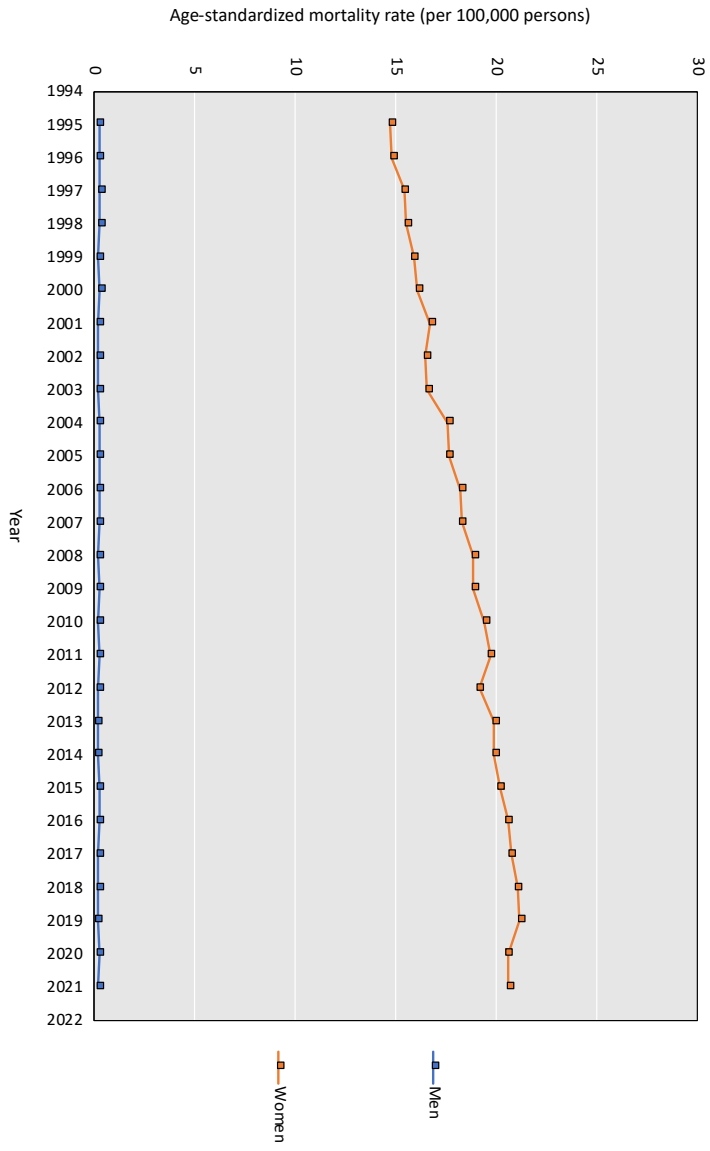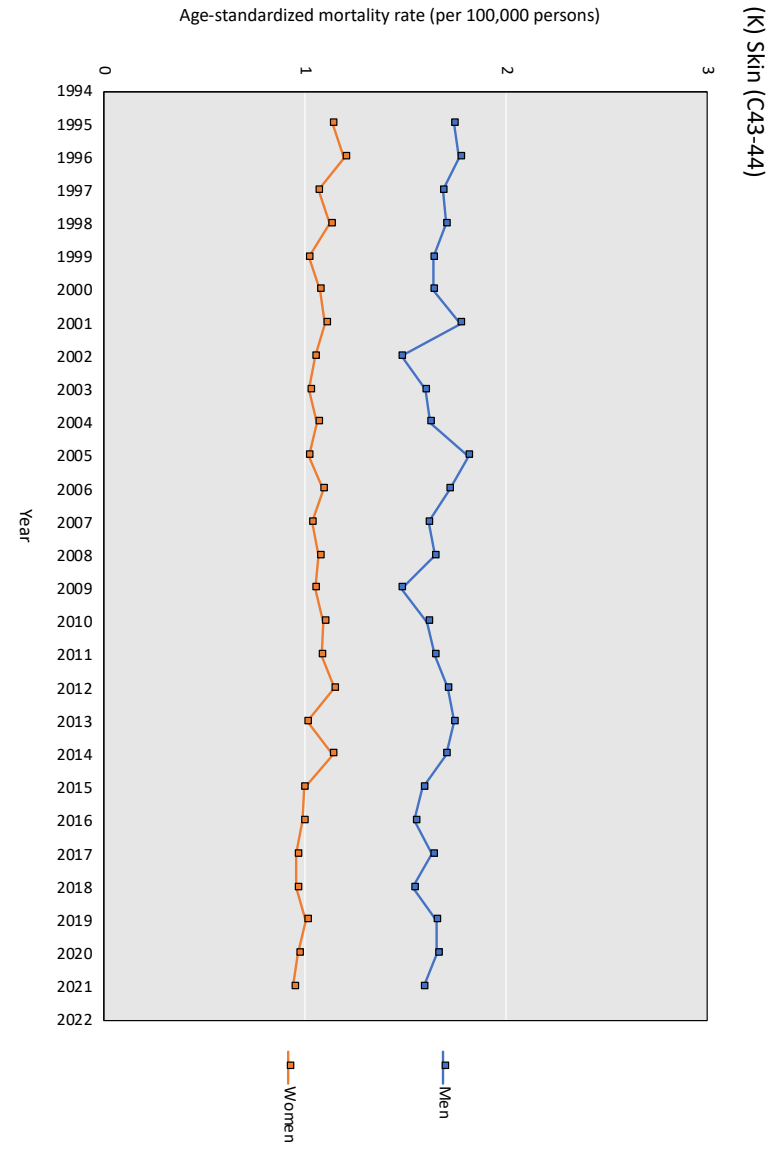

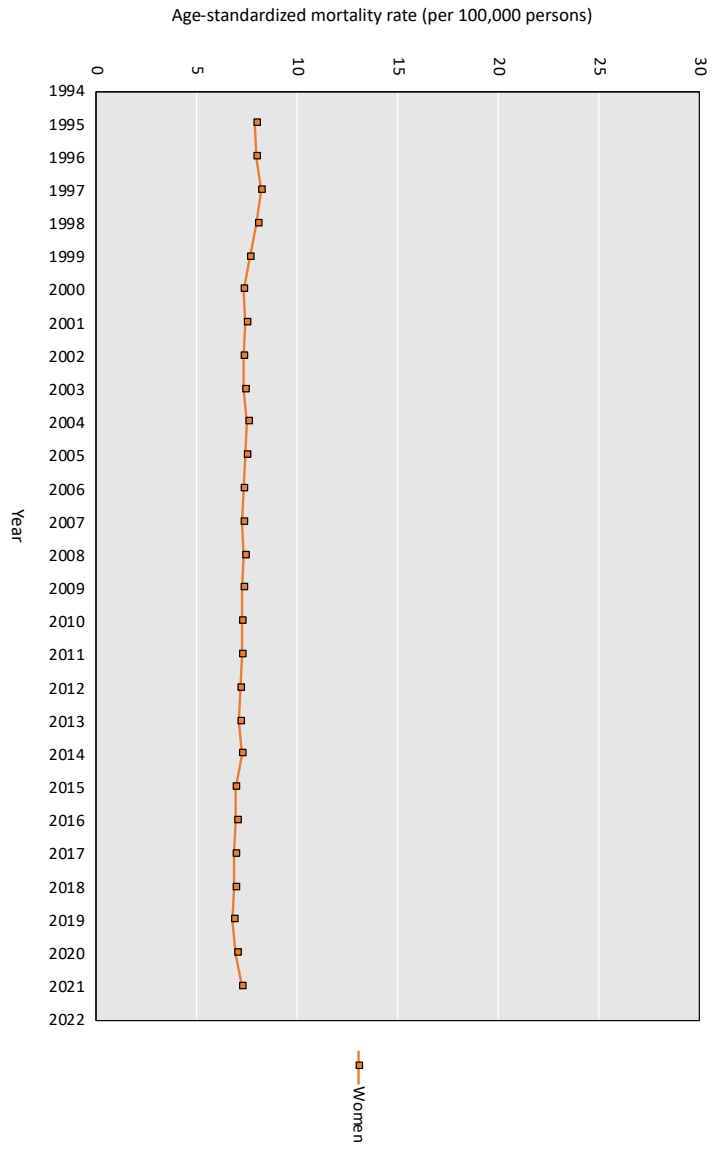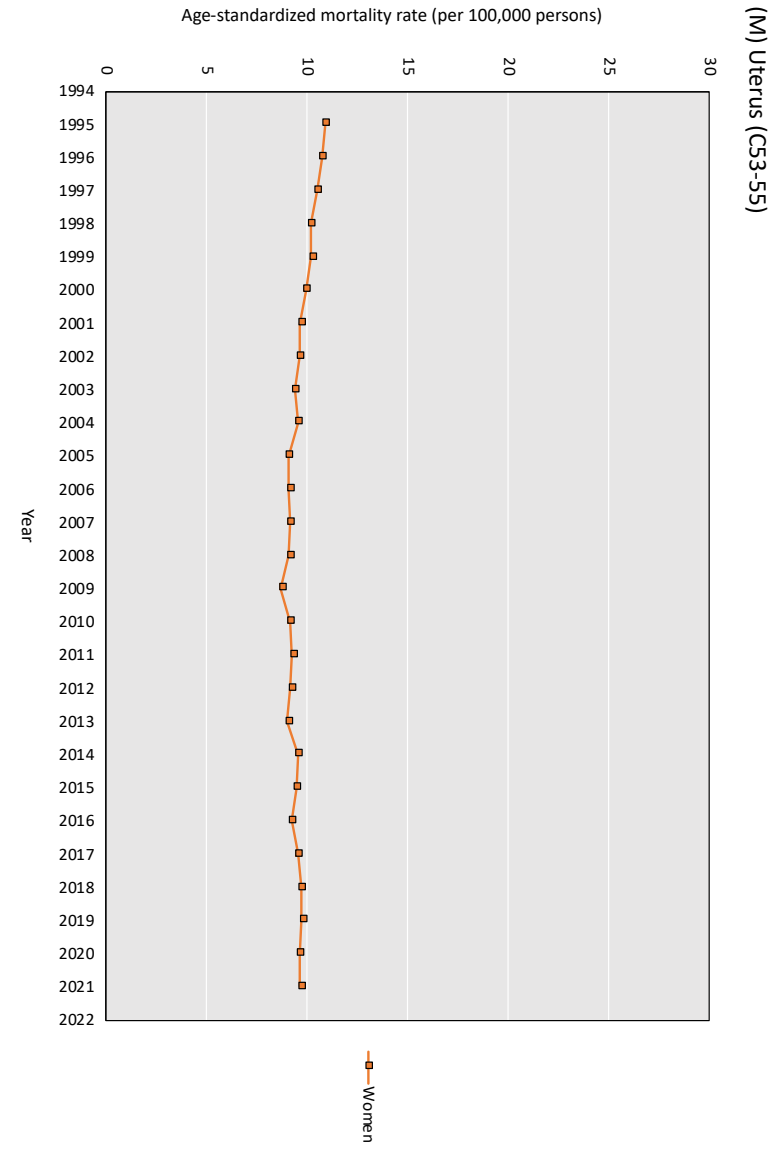



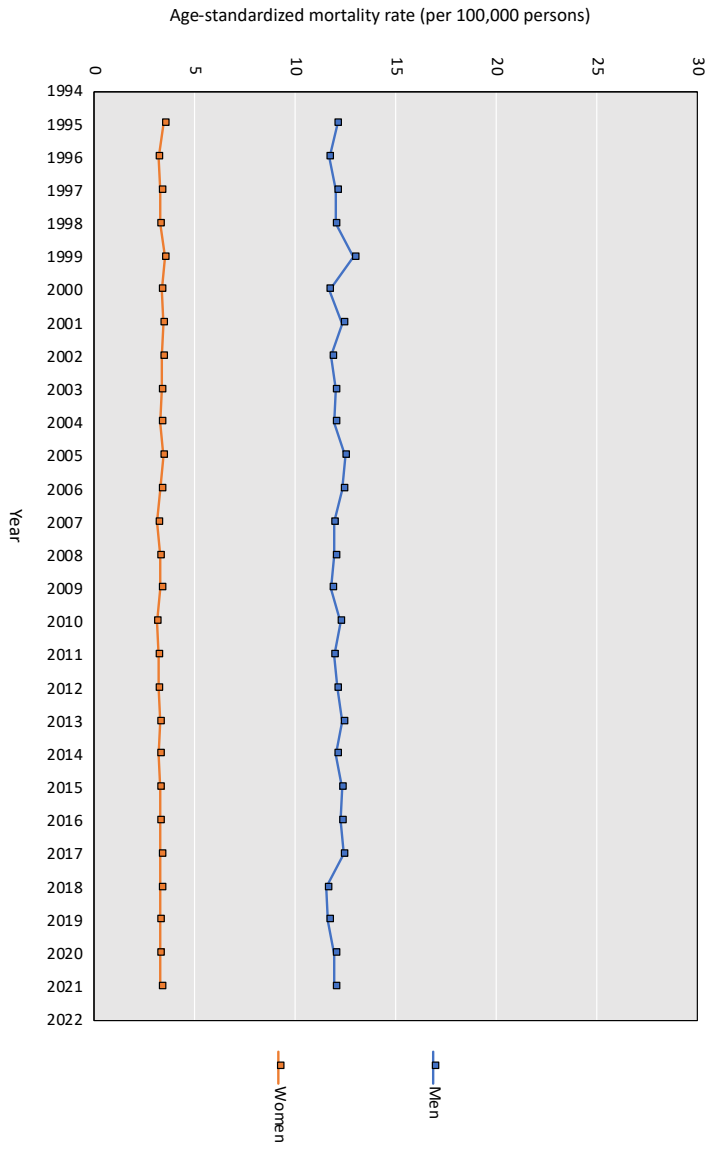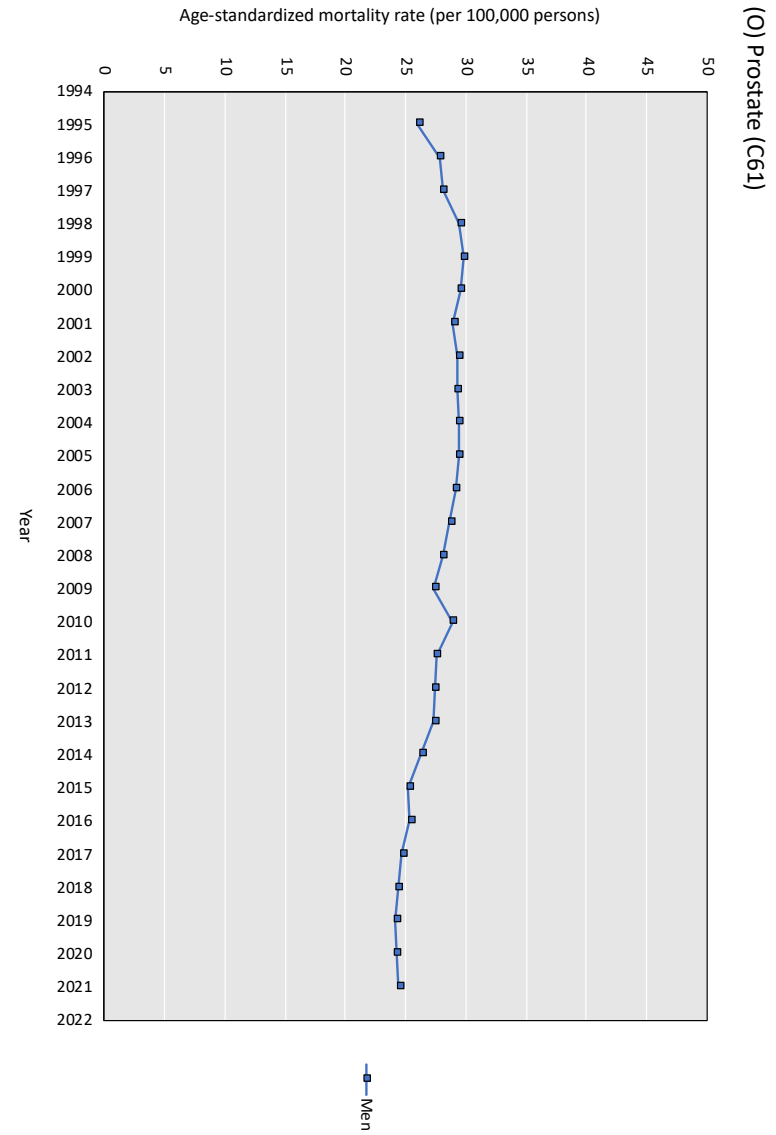

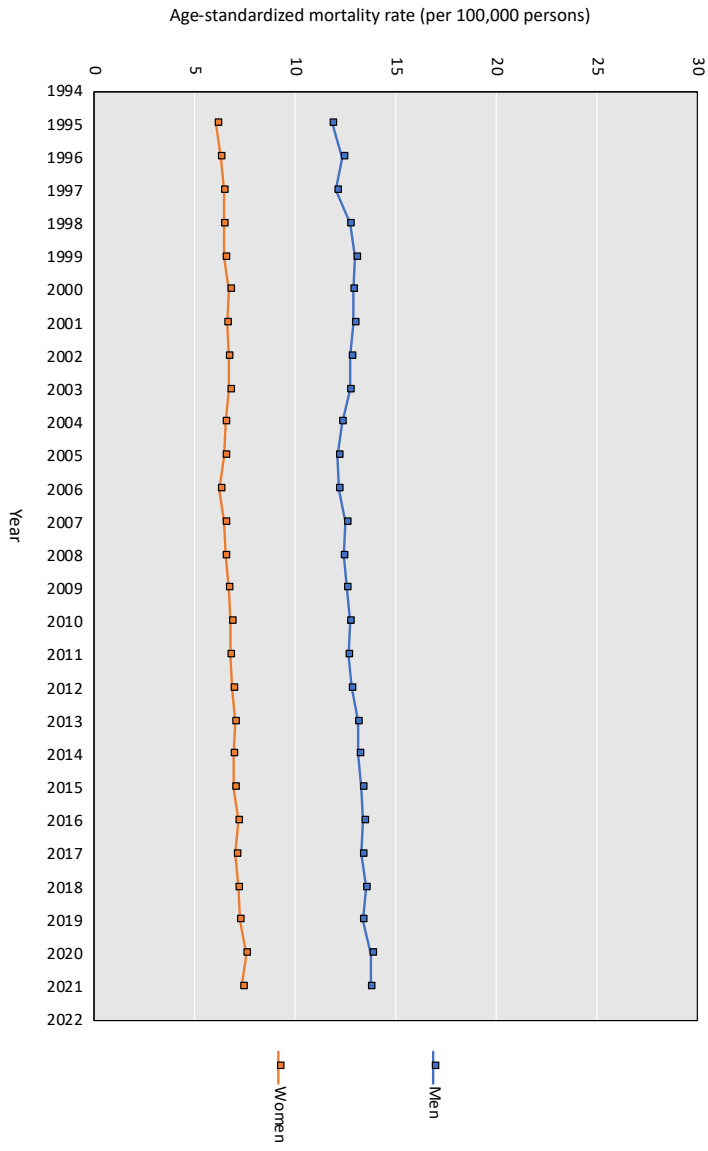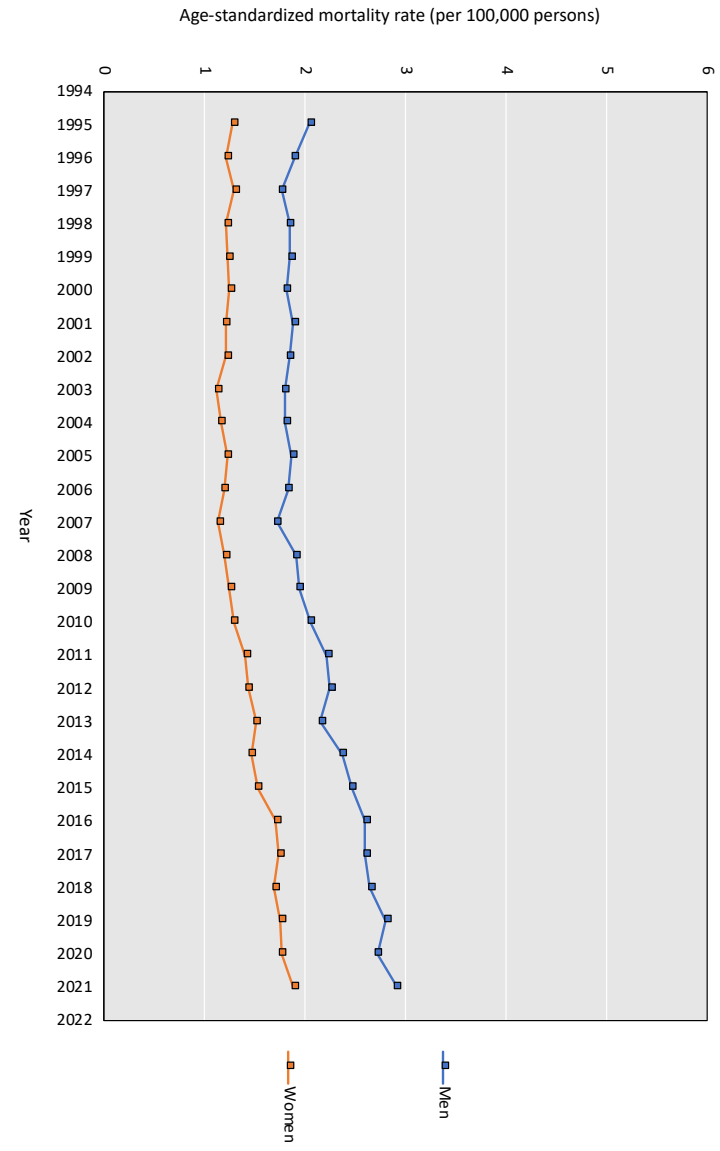

(S) Leukemia (C91-95)

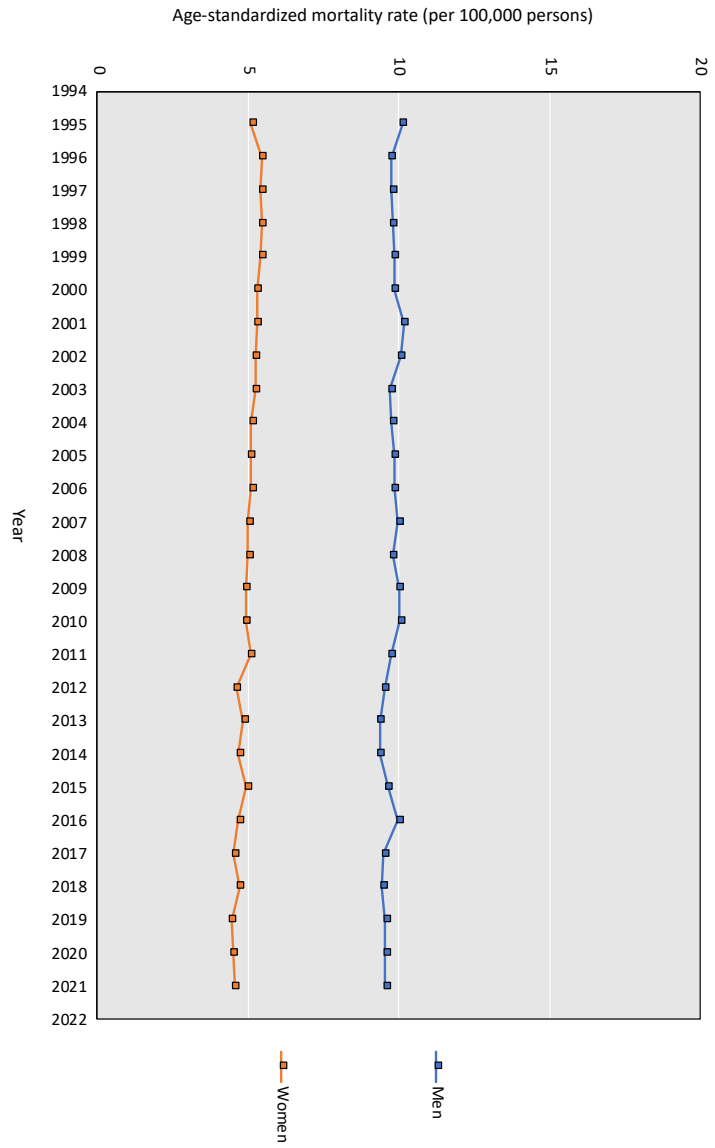

Appendix Figure 3. Trends in cancer age-standardized mortality rates by cancer site between 1995 and 2021
